# Supplementary material for: Immune Response to a Variable Pathogen: A Stochastic Model with Two Interlocked Darwinian Entities
Source: Comput Math Methods Med. 2012 Dec 2;2012:784512. doi: 10.1155/2012/784512 (PMC3574756; doi:10.1155/2012/784512)
Supplement: Supplementary file 1 — The Supplementary material includes videos (Video 3, Video 4, Video 7, Video 9, Video 10, Video 12, Video 13) demonstrating the time development from which snap-shots were singlet out and displayed in the corresponding figures (see inside PDF) of the paper Immune Response to a Variable Pathogen: A Stochastic Model with Two Interlocked Darwinian Entities by Christoph Kuhn. Video 3: Dynamical stochastic process of multiplication and selection. Discrete limit. Video 4: Dynamical stochastic process of multiplication and selection. Continuous limit. Video 7: Dynamical stochastic process for initial form A and mutant B. Video 9: Computer result of a pathogen P (with antigen A) coupled through averages to an immune system consisting of an effector E (producing antigen receptor a) and memory M. Case where pathogen is eliminated. Video 10: Computer result of a pathogen P (with antigen A) coupled through averages to an immune system consisting of an effector E (producing antigen receptor a) and memory M. Case where the pathogen is reappearing while the immune system response is low. Video 12: Computer result of a varying pathogen (PA with antigen A changing into PB with antigen B) coupled through averages to an immune system against antigen A consisting of an effector Ea and memory Ma and against antigen B consisting of an effector Eb and memory Mb. Partial change of pathogen PA to pathogen PB escaping immune effector Ea and with delayed immune response of effector Eb. Figure 13: Computer result of the maturation process of T-lymphocytes. First a naive T-lymphocyte (L Naive, green) in bone marrow or thymus undergoes T-cell receptor rearrangement (β-selection). T-cells with high affinity to self-peptides MHC (L Self, black) are eliminated (negative selection), whereas T-cells with T cell receptors that are able to bind self-peptides MHC molecules with at least a weak affinity (L Mat->I, blue and L Mat->A, red) survive (positive selection) and circulate in the peripheral lympha [file 784512.f1.zip]

Archive with 7 entries (7 files):
- Video.10.mp4
- Video.12.mp4
- Video.13.mp4
- Video.3.mp4
- Video.4.mp4
- Video.7.mp4
- Video.9.mp4
